# Supplementary material for: Identifying central elements of the therapeutic alliance in the setting of telerehabilitation: A qualitative study
Source: PubMed Central journal article supplement (PMC10923432; doi:10.1371/journal.pone.0299909), 2024-03-08
Supplement: pone.0299909.s001.pdf [file pone.0299909.s001.pdf]

**S1 File. Consolidated criteria for reporting qualitative studies (COREQ): 32-item checklist.**

Developed from:

Tong A, Sainsbury P, Craig J. Consolidated criteria for reporting qualitative research (COREQ): a 32-item checklist for interviews and focus groups.

*International Journal for Quality in Health Care.* 2007. Volume 19, Number 6: pp.

349 – 357

| No. Item                                       | Guide questions/description                            | Reported on Page # |
|------------------------------------------------|--------------------------------------------------------|--------------------|
| <b>Domain 1: Research team and reflexivity</b> |                                                        |                    |
| <i>Personal Characteristics</i>                |                                                        |                    |
| 1. Inter viewer/facilitator                    | Which author/s conducted the interview or focus group? | 8                  |
| 2. Credentials                                 | What were the researcher's credentials? E.g. PhD, MD   | S1 Table           |
| 3. Occupation                                  | What was their occupation at the time of the study?    | S1 Table           |
| 4. Gender                                      | Was the researcher male or female?                     | S1 Table           |
| 5. Experience and training                     | What experience or training did the researcher have?   | 8; S1 Table        |
| <i>Relationship with</i>                       |                                                        |                    |

|                                             |                                                                                                                                                           |             |
|---------------------------------------------|-----------------------------------------------------------------------------------------------------------------------------------------------------------|-------------|
| <i>participants</i>                         |                                                                                                                                                           |             |
| 6. Relationship established                 | Was a relationship established prior to study commencement?                                                                                               | 8           |
| 7. Participant knowledge of the interviewer | What did the participants know about the researcher? e.g. personal goals, reasons for doing the research                                                  | 8           |
| 8. Interviewer characteristics              | What characteristics were reported about the interviewer/facilitator? E.g., bias, assumptions, reasons and interests in the research topic                | 8; S1 Table |
| <b>Domain 2: study design</b>               |                                                                                                                                                           |             |
| <i>Theoretical framework</i>                |                                                                                                                                                           |             |
| 9. Methodological orientation and Theory    | What methodological orientation was stated to underpin the study? E.g., grounded theory, discourse analysis, ethnography, phenomenology, content analysis | 6           |
| <i>Participant selection</i>                |                                                                                                                                                           |             |
| 10. Sampling                                | How were participants selected? E.g., purposive, convenience, consecutive, snowball                                                                       | 7           |
| 11. Method of approach                      | How were participants approached? e.g. face-to-face, telephone, mail, email                                                                               | 7-8         |

|                                  |                                                                                    |              |
|----------------------------------|------------------------------------------------------------------------------------|--------------|
| 12. Sample size                  | How many participants were in the study?                                           | Abstract, 10 |
| 13. Non-participation            | How many people refused to participate or dropped out? Reasons?                    | 10           |
| <i>Setting</i>                   |                                                                                    |              |
| 14. Setting of data collection   | Where was the data collected? E.g., home, clinic, workplace                        | 8            |
| 15. Presence of non-participants | Was anyone else present besides the participants and researchers?                  | 8            |
| 16. Description of sample        | What are the important characteristics of the sample? E.g., demographic data, date | Table 1      |
| <i>Data collection</i>           |                                                                                    |              |
| 17. Interview guide              | Were questions, prompts, guides provided by the authors? Was it pilot tested?      | S2 Table; 26 |
| 18. Repeat interviews            | Were repeat inter views carried out? If yes, how many?                             | 8            |
| 19. Audio/visual recording       | Did the research use audio or visual recording to collect the data?                | 8            |
| 20. Field notes                  | Were field notes made during and/or after the inter view or focus group?           | 8            |
| 21. Duration                     | What was the duration of the inter                                                 | 8            |

|                                        |                                                                                                                                  |                      |
|----------------------------------------|----------------------------------------------------------------------------------------------------------------------------------|----------------------|
|                                        | views or focus group?                                                                                                            |                      |
| 22. Data saturation                    | Was data saturation discussed?                                                                                                   | 26                   |
| 23. Transcripts returned               | Were transcripts returned to participants for comment and/or correction?                                                         | 26                   |
| <b>Domain 3: analysis and findings</b> |                                                                                                                                  |                      |
| <i>Data analysis</i>                   |                                                                                                                                  |                      |
| 24. Number of data coders              | How many data coders coded the data?                                                                                             | 9                    |
| 25. Description of the coding tree     | Did authors provide a description of the coding tree?                                                                            | Table 2, S4<br>Table |
| 26. Derivation of themes               | Were themes identified in advance or derived from the data?                                                                      | 9-10                 |
| 27. Software                           | What software, if applicable, was used to manage the data?                                                                       | 8-9                  |
| 28. Participant checking               | Did participants provide feedback on the findings?                                                                               | 26                   |
| <i>Reporting</i>                       |                                                                                                                                  |                      |
| 29. Quotations presented               | Were participant quotations presented to illustrate the themes/findings? Was each quotation identified? E.g., participant number | 14-23                |

|                                  |                                                                        |                             |
|----------------------------------|------------------------------------------------------------------------|-----------------------------|
| 30. Data and findings consistent | Was there consistency between the data presented and the findings?     | 11-23, Table 2, S4 Table    |
| 31. Clarity of major themes      | Were major themes clearly presented in the findings?                   | Abstract, 14, 16, 19, Fig 1 |
| 32. Clarity of minor themes      | Is there a description of diverse cases or discussion of minor themes? | 11-23, Table 2, S4 Table    |
