# Supplementary material for: Identifying central elements of the therapeutic alliance in the setting of telerehabilitation: A qualitative study
Source: PubMed Central journal article supplement (PMC10923432; doi:10.1371/journal.pone.0299909), 2024-03-08
Supplement: pone.0299909.s002.pdf [file pone.0299909.s002.pdf]

**S1 Table. Research team characteristics and attributes.**

| <b>Author</b>     | <b>Characteristics and qualifications</b>                                                                                                                                                                                                                                                                                 |
|-------------------|---------------------------------------------------------------------------------------------------------------------------------------------------------------------------------------------------------------------------------------------------------------------------------------------------------------------------|
| Barbara Seebacher | Female scientist with a PhD degree in physiotherapy including graduate-level training in qualitative research methods, extensive experience with conducting and teaching qualitative research at master's level, and clinical training and advanced practice in neurology, pediatrics, and musculoskeletal rehabilitation |
| Carole Geimer     | Female physiotherapy-scientist studying for a master's degree in therapeutic sciences, with the present research representing a partial fulfilment of her master's degree; MAXQDA and graduate-level training in qualitative research methods, and clinical training and practice as a geriatric physiotherapist          |
| Julia Neu         | Female research associate studying for a master's degree in therapeutic sciences, MAXQDA and graduate-level training in qualitative research methods, and clinical training and practice as a musculoskeletal rehabilitation physiotherapist                                                                              |
| Maria Schwarz     | Female clinical and health psychologist and psychotherapist-scientist with a master's degree, training in cognitive behavioral therapy and communication, and clinical training and advanced practice as a psychologist and psychotherapist in psychosocial rehabilitation and neurology among others                     |

|                 |                                                                                                                                                                                                                                                                                               |
|-----------------|-----------------------------------------------------------------------------------------------------------------------------------------------------------------------------------------------------------------------------------------------------------------------------------------------|
| Gudrun Diermayr | Female scientist with a PhD degree in physiotherapy including graduate-level training in qualitative research methods, Professorship at a German university, extensive experience with conducting and teaching qualitative research, and clinical training and advanced practice in neurology |
|-----------------|-----------------------------------------------------------------------------------------------------------------------------------------------------------------------------------------------------------------------------------------------------------------------------------------------|
