# Supplementary material for: Identifying central elements of the therapeutic alliance in the setting of telerehabilitation: A qualitative study
Source: PubMed Central journal article supplement (PMC10923432; doi:10.1371/journal.pone.0299909), 2024-03-08
Supplement: pone.0299909.s003.pdf [file pone.0299909.s003.pdf]

**S2 Table. Keywords used for the literature search and exemplary interview guide.**

|                                                                                         |                                                                                                                                                                                                                                                                                                                                                                                                                                                                                                                                                                                 |
|-----------------------------------------------------------------------------------------|---------------------------------------------------------------------------------------------------------------------------------------------------------------------------------------------------------------------------------------------------------------------------------------------------------------------------------------------------------------------------------------------------------------------------------------------------------------------------------------------------------------------------------------------------------------------------------|
| <b>Keywords used for the literature search</b>                                          |                                                                                                                                                                                                                                                                                                                                                                                                                                                                                                                                                                                 |
| <b>PubMed and<br/>Cochrane Library<br/>databases, and<br/>Google Scholar<br/>search</b> | Therapeutic alliance AND rehabilitation; therapeutic alliance AND rehabilitation AND (telehealth OR telemedicine OR telerehabilitation); therapeutic (alliance OR relation) AND rehabilitation AND (telehealth OR telemedicine OR telerehabilitation); therapeutic (alliance OR relationship) AND rehabilitation AND (telehealth OR telemedicine OR telerehabilitation) AND working alliance inventory. As a result of the search, an adapted concept map was created, which served as a basis for the design of the interview guidelines.                                      |
| <b>Interview guide example of an expert who is a physiotherapist and psychologist</b>   |                                                                                                                                                                                                                                                                                                                                                                                                                                                                                                                                                                                 |
| <b>Introduction</b>                                                                     | I am pleased that the appointment worked out and that I can interview you today on the topic of therapeutic alliance. First of all, I would like to give you a few explanations. Therapeutic alliance and relationship between therapist and patient are used as synonyms. During the interview I ask you questions about your experience of the therapeutic alliance in physiotherapy and your psychological knowledge. If you did not understand a question, please ask and I will be happy to explain it further.<br><br>Do you have any further questions before the start? |
| <b>Entry questions</b>                                                                  | Can you please tell me what TA means to you?                                                                                                                                                                                                                                                                                                                                                                                                                                                                                                                                    |

|                  |                                                                                                                                                                                                                                                                                                                                                                                                                                                                                                                                                                                                                                                                                                                                                                                                                                                                                                                                                                                                                                                                                                                                 |
|------------------|---------------------------------------------------------------------------------------------------------------------------------------------------------------------------------------------------------------------------------------------------------------------------------------------------------------------------------------------------------------------------------------------------------------------------------------------------------------------------------------------------------------------------------------------------------------------------------------------------------------------------------------------------------------------------------------------------------------------------------------------------------------------------------------------------------------------------------------------------------------------------------------------------------------------------------------------------------------------------------------------------------------------------------------------------------------------------------------------------------------------------------|
|                  | Which factors of the TA are particularly important to you?                                                                                                                                                                                                                                                                                                                                                                                                                                                                                                                                                                                                                                                                                                                                                                                                                                                                                                                                                                                                                                                                      |
| <b>Questions</b> | <p>How does communication take place in therapy?</p> <p>What channels of communication do you consider relevant?</p> <p>Which phases in the process of physiotherapy successful communication is important for?</p> <p>In your opinion, does communication influence the relationship between therapist and patient?</p> <p>What do you think are the similarities or differences of communication in physiotherapy and psychology / psychotherapy?</p> <p>How are goals and tasks set in physiotherapy?</p> <p>In your opinion, are there differences between physiotherapy and psychology / psychotherapy?</p> <p>Can you please tell me what the roles of patients and therapists should look like?</p> <p>Are there possibly other roles besides the patient and therapist roles?</p> <p>Tell me, please, what role do you think motivation plays in therapy?</p> <p>How can patients be motivated in physiotherapy and in psychology / psychotherapy?</p> <p>Are there external factors that you think influence the relationship between therapist and patient? Please explain.</p> <p>What influence does time have?</p> |

|  |                                                                                                                                                                                                                                                                                                                                                                                                                                                                                                                                                            |
|--|------------------------------------------------------------------------------------------------------------------------------------------------------------------------------------------------------------------------------------------------------------------------------------------------------------------------------------------------------------------------------------------------------------------------------------------------------------------------------------------------------------------------------------------------------------|
|  | <p>What influence does safety have?</p> <p>What influence does the family have?</p> <p>In your opinion, are there similarities or differences between physiotherapy and psychology / psychotherapy?</p> <p>Which factors of the TA are particularly important to you?</p> <p>What role does trust play in therapy?</p> <p>How important is self-disclosure on the part of the therapist and the patient?</p> <p>Does empathy play a role in therapy?</p>                                                                                                   |
|  | <p>Does humor play a role in therapy?</p> <p>What role does professional collaboration play in therapy?</p> <p>Is it superior, inferior, or equal to the emotional?</p> <p>In your opinion, are there similarities or differences between the TA in physiotherapy and psychology / psychotherapy? Please describe.</p> <p>Could you please describe the interaction between the TA and technologies?</p> <p>In your opinion, do technologies have an influence on the distribution of roles?</p> <p>Does technology impact on the TA in any other way?</p> |

|                |                                                                                                                                                                                                                                        |
|----------------|----------------------------------------------------------------------------------------------------------------------------------------------------------------------------------------------------------------------------------------|
| <b>Prompts</b> | Repetition, paraphrasing, request for clarification or confirmation, such as:<br>What else goes through your mind when you hear the term therapeutic alliance?                                                                         |
|                | Could you tell me something more about ...?<br>Can you think of anything else to say about ...?<br>And what else?<br>You have mentioned that .... Is there anything you would like to add?<br>Could you please elaborate more on that? |
