# Supplementary material for: Identifying central elements of the therapeutic alliance in the setting of telerehabilitation: A qualitative study
Source: PubMed Central journal article supplement (PMC10923432; doi:10.1371/journal.pone.0299909), 2024-03-08
Supplement: pone.0299909.s004.pdf [file pone.0299909.s004.pdf]

**S3 Table. Influencing elements of a successful therapeutic alliance based on the literature search.**

| Main elements                                         | Secondary elements                      | Statements                                                                                                                                                                                                                                                                                                                                                                                               | References |
|-------------------------------------------------------|-----------------------------------------|----------------------------------------------------------------------------------------------------------------------------------------------------------------------------------------------------------------------------------------------------------------------------------------------------------------------------------------------------------------------------------------------------------|------------|
| <b>Relationship between the patient and therapist</b> | Emotional and professional relationship | <ul style="list-style-type: none"> <li>• The personal, emotional, and professional relationship represent the core components of the therapeutic alliance (TA).</li> <li>• The therapist's empathy and responsiveness play an important role.</li> <li>• Mutual sharing of emotions and self-revelation is a foundation of personal relationship</li> <li>• Common focus between all involved</li> </ul> | [1, 2]     |
|                                                       |                                         | <ul style="list-style-type: none"> <li>• The patient should be valued with his/her individual physical, psychological, cultural, and social characteristics and needs in relation to personal goals and therapy contents.</li> <li>• The patient is in the foreground, not the disease.</li> </ul>                                                                                                       | [3-6]      |
|                                                       |                                         | <ul style="list-style-type: none"> <li>• For the transmission of knowledge at a professional level</li> </ul>                                                                                                                                                                                                                                                                                            | [7]        |
|                                                       |                                         | <ul style="list-style-type: none"> <li>• Shared responsibility</li> </ul>                                                                                                                                                                                                                                                                                                                                | [8]        |

|  |                                  |                                                                                                                                                                                           |                                                                                                                   |         |
|--|----------------------------------|-------------------------------------------------------------------------------------------------------------------------------------------------------------------------------------------|-------------------------------------------------------------------------------------------------------------------|---------|
|  | Roles and responsibilities       | <ul style="list-style-type: none"> <li>• Client-centred approach, which means active participation of the patient.</li> <li>• Defined distribution of roles to avoid conflict</li> </ul>  | [9, 10]                                                                                                           |         |
|  |                                  | <ul style="list-style-type: none"> <li>• Balance between patient autonomy and therapist support is a challenge</li> </ul>                                                                 | [11]                                                                                                              |         |
|  | Humor                            | <ul style="list-style-type: none"> <li>• Humor puts the illness in the background and improves mood.</li> </ul>                                                                           | [1]                                                                                                               |         |
|  | Congruence of the therapist      | <ul style="list-style-type: none"> <li>• Being genuine, open, and authentic during the interactions with the patient is a significant factor of the TA at a professional level</li> </ul> | [1]                                                                                                               |         |
|  | Physical presence of a therapist | <ul style="list-style-type: none"> <li>• Challenge to ensure safety in telerehabilitation</li> </ul>                                                                                      | [12]                                                                                                              |         |
|  |                                  | <ul style="list-style-type: none"> <li>• Psychological and physical support by the therapist is relevant and can be guaranteed by his/her presence.</li> </ul>                            | [8, 13]                                                                                                           |         |
|  |                                  | <ul style="list-style-type: none"> <li>• To enable a comprehensive physical examination</li> </ul>                                                                                        | [12, 14]                                                                                                          |         |
|  |                                  | <ul style="list-style-type: none"> <li>• Lack of physical presence is a barrier to TA in telerehabilitation</li> </ul>                                                                    | [15]                                                                                                              |         |
|  | <b>Trust</b>                     | Aspects of trust                                                                                                                                                                          | <ul style="list-style-type: none"> <li>• Exchange of information is important to develop mutual trust.</li> </ul> | [3, 16] |
|  |                                  |                                                                                                                                                                                           | <ul style="list-style-type: none"> <li>• Positive feedback, empathy and respect promote trust building</li> </ul> | [3]     |

|                            |                         |                                                                                                                                                                                                                                                                                                                                                                                                                                                                                                                                                                                                                      |      |
|----------------------------|-------------------------|----------------------------------------------------------------------------------------------------------------------------------------------------------------------------------------------------------------------------------------------------------------------------------------------------------------------------------------------------------------------------------------------------------------------------------------------------------------------------------------------------------------------------------------------------------------------------------------------------------------------|------|
|                            |                         | <ul style="list-style-type: none"> <li>• A sense of safety strengthens trust</li> </ul>                                                                                                                                                                                                                                                                                                                                                                                                                                                                                                                              | [12] |
|                            |                         | <ul style="list-style-type: none"> <li>• Safety is not directly guaranteed in telerehabilitation and thus a challenge for trust</li> </ul>                                                                                                                                                                                                                                                                                                                                                                                                                                                                           | [17] |
| <b>Communi-<br/>cation</b> | Exchange of information | <ul style="list-style-type: none"> <li>• Exchange of information is essential for the development of TA</li> </ul>                                                                                                                                                                                                                                                                                                                                                                                                                                                                                                   | [8]  |
|                            |                         | <ul style="list-style-type: none"> <li>• Significant for interaction, satisfaction, and therapy success</li> </ul>                                                                                                                                                                                                                                                                                                                                                                                                                                                                                                   | [18] |
|                            | Effective communication | <ul style="list-style-type: none"> <li>• Effective communication improves the rehabilitation process</li> <li>• Getting to know each other: shared decision-making, congruence between patient and therapist, person-centred communication, respect, active listening, understanding, sympathy and the recognition of the patient as a person with individual needs.</li> <li>• Effective sharing of information, and education of patients: understanding is essential and should be ensured</li> <li>• Joint goal setting and treatment planning is relevant and promoting self-awareness on both sides</li> </ul> | [19] |
|                            | Communication channels  | <ul style="list-style-type: none"> <li>• Through the body (non-verbal): Facial expression, posture, gestures and / or movements</li> </ul>                                                                                                                                                                                                                                                                                                                                                                                                                                                                           | [20] |

|                                     |                                                                                                       |                                                                                                                                                                                                                           |      |
|-------------------------------------|-------------------------------------------------------------------------------------------------------|---------------------------------------------------------------------------------------------------------------------------------------------------------------------------------------------------------------------------|------|
|                                     |                                                                                                       | <ul style="list-style-type: none"> <li>• Verbal and para-verbal: Voice, intonation, flow of speech</li> </ul>                                                                                                             | [21] |
|                                     |                                                                                                       | <ul style="list-style-type: none"> <li>• General: (1) words and speech, (2) facial expressions and gestures, (3) eyes and gaze, (4) ears and sound of voice, (5) skin and touch, and (6) posture and movement.</li> </ul> | [22] |
|                                     | Communication in telerehabilitation                                                                   | <ul style="list-style-type: none"> <li>• In telerehabilitation, non-verbal communication is limited due to the distance</li> </ul>                                                                                        | [23] |
|                                     |                                                                                                       | <ul style="list-style-type: none"> <li>• In telerehabilitation, non-verbal communication is limited due to technical aspects</li> </ul>                                                                                   | [24] |
|                                     |                                                                                                       | <ul style="list-style-type: none"> <li>• Importance of face-to-face communication for non-verbal aspects of communication</li> </ul>                                                                                      | [25] |
| Technical aspects                   | <ul style="list-style-type: none"> <li>• Time-delay has a negative impact on communication</li> </ul> | [25, 26]                                                                                                                                                                                                                  |      |
| <b>Agreement on tasks and goals</b> | Agreement on goals                                                                                    | <ul style="list-style-type: none"> <li>• Agreement between therapist and patient plays an important role in goal setting and decision making in therapy.</li> </ul>                                                       | [9]  |
|                                     |                                                                                                       | <ul style="list-style-type: none"> <li>• Important for the development of TA and thus also for the implementation of therapy</li> </ul>                                                                                   | [20] |

|                                     |                                                       |                                                                                                                                                                                                                                                               |          |
|-------------------------------------|-------------------------------------------------------|---------------------------------------------------------------------------------------------------------------------------------------------------------------------------------------------------------------------------------------------------------------|----------|
|                                     | Motivation                                            | <ul style="list-style-type: none"> <li>• Goal setting and consideration of needs increases motivation</li> </ul>                                                                                                                                              | [27]     |
|                                     |                                                       | <ul style="list-style-type: none"> <li>• The patient's expectation of success and achievement of goals strengthen motivation</li> </ul>                                                                                                                       | [7, 28]  |
|                                     | Autonomy                                              | <ul style="list-style-type: none"> <li>• Self-management leads to long-term therapy success</li> </ul>                                                                                                                                                        | [29]     |
|                                     |                                                       | <ul style="list-style-type: none"> <li>• Patient engagement is an important aspect especially in telerehabilitation</li> </ul>                                                                                                                                | [30-32]  |
| <b>External influencing factors</b> | Relatives and/or caregivers as part of the TA         | <ul style="list-style-type: none"> <li>• Relatives and/or caregivers are part of the TA; it is spoken of as a triad</li> </ul>                                                                                                                                | [33]     |
|                                     |                                                       | <ul style="list-style-type: none"> <li>• Relatives and/or caregivers support patients and thus promote the rehabilitation process</li> </ul>                                                                                                                  | [1]      |
|                                     |                                                       | <ul style="list-style-type: none"> <li>• Shared relationship between therapist, child and parents</li> </ul>                                                                                                                                                  | [3]      |
|                                     | Relatives and/or caregivers provide technical support | <ul style="list-style-type: none"> <li>• Support during the therapy preparation, such as switching on the device or the software programme.</li> <li>• Support during the therapy procedure to position the camera correctly and/or ensure safety.</li> </ul> | [10]     |
|                                     |                                                       | <ul style="list-style-type: none"> <li>• Clinical environment counteracts development of deep TA</li> </ul>                                                                                                                                                   | [15, 33] |

|  |                                          |                                                                                                                                                                                                                         |      |
|--|------------------------------------------|-------------------------------------------------------------------------------------------------------------------------------------------------------------------------------------------------------------------------|------|
|  | Preferred surroundings for developing TA | <ul style="list-style-type: none"> <li>• Home environment is perceived as a relaxed atmosphere and promotes the building of TA</li> </ul>                                                                               |      |
|  |                                          | <ul style="list-style-type: none"> <li>• Some patients want a separation between home and the rehabilitation environment.</li> <li>• Some patients find exercising in the home environment enjoyable.</li> </ul>        | [15] |
|  | Time as a resource                       | <ul style="list-style-type: none"> <li>• Time is a significant factor in building trust.</li> </ul>                                                                                                                     | [34] |
|  |                                          | <ul style="list-style-type: none"> <li>• Time is essential for getting to know each other and for communication.</li> <li>• A sufficient exchange of information makes it easier to take needs into account.</li> </ul> | [35] |
|  |                                          | <ul style="list-style-type: none"> <li>• In telerehabilitation, more time is spent with the patient, which promotes TA.</li> </ul>                                                                                      | [12] |

### References for S3 Table

1. Bishop M, Kayes N, McPherson K. Understanding the therapeutic alliance in stroke rehabilitation. *Disability and Rehabilitation*. 2021;43(8):1074-83. doi: 10.1080/09638288.2019.1651909.
2. Bordin E. The generalizability of the psychoanalytic concept of the working alliance. *Psychotherapy*. 1979;16:252-60.

3. Crom A, Paap D, Wijma A, Dijkstra PU, Pool G. Between the Lines: A Qualitative Phenomenological Analysis of the Therapeutic Alliance in Pediatric Physical Therapy. *Physical & Occupational Therapy In Pediatrics*. 2020;40(1):1-14. doi: 10.1080/01942638.2019.1610138.
4. Moore AJ, Holden MA, Foster NE, Jinks C. Therapeutic alliance facilitates adherence to physiotherapy-led exercise and physical activity for older adults with knee pain: a longitudinal qualitative study. *J Physiother*. 2020;66(1):45-53. Epub 2019/12/18. doi: 10.1016/j.jphys.2019.11.004. PubMed PMID: 31843425.
5. Lawford BJ, Bennell KL, Campbell PK, Kasza J, Hinman RS. Therapeutic Alliance Between Physical Therapists and Patients With Knee Osteoarthritis Consulting Via Telephone: A Longitudinal Study. *Arthritis Care & Research*. 2020;72(5):652-60. doi: <https://doi.org/10.1002/acr.23890>.
6. Gómez Penedo JM, Babl AM, Grosse Holtforth M, Hohagen F, Krieger T, Lutz W, et al. The Association of Therapeutic Alliance With Long-Term Outcome in a Guided Internet Intervention for Depression: Secondary Analysis From a Randomized Control Trial. *J Med Internet Res*. 2020;22(3):e15824. Epub 2020/03/25. doi: 10.2196/15824. PubMed PMID: 32207689; PubMed Central PMCID: PMC7139432.
7. Vestøl I, Debesay J, Pajalic Z, Bergland A. The importance of a good therapeutic alliance in promoting exercise motivation in a group of older Norwegians in the subacute phase of hip fracture; a qualitative study. *BMC Geriatrics*. 2020;20(1):118. doi: 10.1186/s12877-020-01518-7.
8. Miciak M, Mayan M, Brown C, Joyce AS, Gross DP. A framework for establishing connections in physiotherapy practice. *Physiotherapy Theory and Practice*. 2019;35(1):40-56. doi: 10.1080/09593985.2018.1434707.
9. Ranner M, Guidetti S, von Koch L, Tham K. Experiences of participating in a client-centred ADL intervention after stroke. *Disability and Rehabilitation*. 2019;41(25):3025-33. doi: 10.1080/09638288.2018.1483434.
10. Wilms IL. The computerized cognitive training alliance - A proposal for a therapeutic alliance model for home-based computerized cognitive training. *Heliyon*. 2020;6(1):e03254. Epub 2020/02/12. doi: 10.1016/j.heliyon.2020.e03254. PubMed PMID: 32042977; PubMed Central PMCID: PMC7002830.
11. Cott C. Client-centred rehabilitation: client perspectives. *Disability and Rehabilitation*. 2004;26(24):1411-22. doi: 10.1080/09638280400000237.
12. Shulver W, Killington M, Morris C, Crotty M. 'Well, if the kids can do it, I can do it': older rehabilitation patients' experiences of telerehabilitation. *Health Expectations*. 2017;20(1):120-9. doi: <https://doi.org/10.1111/hex.12443>.
13. Miciak M, Mayan M, Brown C, Joyce AS, Gross DP. The necessary conditions of engagement for the therapeutic relationship in physiotherapy: an interpretive description study. *Archives of Physiotherapy*. 2018;8(1):3. doi: 10.1186/s40945-018-0044-1.
14. Kairy D, Tousignant M, Leclerc N, Côté A-M, Levasseur M, Researchers TT. The patient's perspective of in-home telerehabilitation physiotherapy services following total knee arthroplasty. *International journal of environmental research and public health*. 2013;10(9):3998-4011. doi: 10.3390/ijerph10093998. PubMed PMID: 23999548.

15. Cranen K, Drossaert CHC, Brinkman ES, Braakman-Jansen ALM, Ijzerman MJ, Vollenbroek-Hutten MMR. An exploration of chronic pain patients' perceptions of home telerehabilitation services. *Health Expectations: An International Journal of Public Participation in Health Care & Health Policy*. 2012;15(4):339-50. doi: 10.1111/j.1369-7625.2011.00668.x.
16. Price B. Developing patient rapport, trust and therapeutic relationships. *Nurs Stand*. 2017;31(50):52-63. Epub 2017/08/10. doi: 10.7748/ns.2017.e10909. PubMed PMID: 28792344.
17. Held JP, Ferrer B, Mainetti R, Steblin A, Hertler B, Moreno-Conde A, et al. Autonomous rehabilitation at stroke patients home for balance and gait: safety, usability and compliance of a virtual reality system. *European Journal of Physical and Rehabilitation Medicine* 2018;54(4):545-53. Epub 2017/09/28. doi: 10.23736/s1973-9087.17.04802-x. PubMed PMID: 28949120.
18. O'Keeffe M, Cullinane P, Hurley J, Leahy I, Bunzli S, O'Sullivan PB, et al. What Influences Patient-Therapist Interactions in Musculoskeletal Physical Therapy? Qualitative Systematic Review and Meta-Synthesis. *Physical Therapy*. 2016;96(5):609-22. doi: 10.2522/ptj.20150240.
19. Jesus TS, Silva IL. Toward an evidence-based patient-provider communication in rehabilitation: linking communication elements to better rehabilitation outcomes. *Clinical Rehabilitation*. 2015;30(4):315-28. doi: 10.1177/0269215515585133.
20. Babatunde F, MacDermid J, MacIntyre N. Characteristics of therapeutic alliance in musculoskeletal physiotherapy and occupational therapy practice: a scoping review of the literature. *BMC health services research*. 2017;17(1):375. doi: 10.1186/s12913-017-2311-3.
21. Fuchs T. Non-verbale Kommunikation: Phänomenologische, entwicklungspsychologische und therapeutische Aspekte. *Zeitschrift für Klinische Psychologie und Psychotherapie*. 2003;51:333-45.
22. Geuter U. *Praxis Körperpsychotherapie – 10 Prinzipien der Arbeit im therapeutischen Prozess*. Berlin, Deutschland: Springer; 2019.
23. Egolf DB. Nonverbal Communication and Telerehabilitation. In: Kumar S, Cohn ER, editors. *Telerehabilitation*. Health Informatics. London: Springer; 2013. p. 41–54.
24. Wade SL, Raj SP, Moscato EL, Narad ME. Clinician perspectives delivering telehealth interventions to children/families impacted by pediatric traumatic brain injury. *Rehabilitation Psychology*. 2019;64(3):298-306. doi: 10.1037/rep0000268.
25. Lie SS, Karlsen B, Graue M, Oftedal B. The influence of an eHealth intervention for adults with type 2 diabetes on the patient–nurse relationship: a qualitative study. *Scandinavian Journal of Caring Sciences*. 2019;33(3):741-9. doi: <https://doi.org/10.1111/scs.12671>.
26. Oftedal B, Kolltveit B-CH, Graue M, Zoffmann V, Karlsen B, Thorne S, et al. Reconfiguring clinical communication in the electronic counselling context: The nuances of disruption. *Nursing Open*. 2019;6(2):393-400. doi: <https://doi.org/10.1002/nop2.218>.
27. Oyake K, Suzuki M, Otaka Y, Tanaka S. Motivational Strategies for Stroke Rehabilitation: A Descriptive Cross-Sectional Study. *Frontiers in Neurology*. 2020;11. doi: 10.3389/fneur.2020.00553.



28. Lequerica AH, Kortte K. Therapeutic engagement: a proposed model of engagement in medical rehabilitation. *Am J Phys Med Rehabil.* 2010;89(5):415-22. Epub 2010/04/22. doi: 10.1097/PHM.0b013e3181d8ceb2. PubMed PMID: 20407308.
29. Dobkin BH. Behavioral self-management strategies for practice and exercise should be included in neurologic rehabilitation trials and care. *Current opinion in neurology.* 2016;29(6):693-9. doi: 10.1097/wco.0000000000000380. PubMed PMID: 00019052-201612000-00005.
30. Dinesen B, Nielsen G, Andreasen JJ, Spindler H. Integration of Rehabilitation Activities Into Everyday Life Through Telerehabilitation: Qualitative Study of Cardiac Patients and Their Partners. *Journal of medical Internet research.* 2019;21(4):e13281. Epub 2019/04/16. doi: 10.2196/13281. PubMed PMID: 30985284; PubMed Central PMCID: PMC6487348.
31. Graffigna G, Barello S, Bonanomi A, Menichetti J. The Motivating Function of Healthcare Professional in eHealth and mHealth Interventions for Type 2 Diabetes Patients and the Mediating Role of Patient Engagement. *Journal of Diabetes Research.* 2016;2016:2974521. doi: 10.1155/2016/2974521.
32. Grünloh C, Myreteg G, Cajander Å, Rexhepi H. "Why Do They Need to Check Me?" Patient Participation Through eHealth and the Doctor-Patient Relationship: Qualitative Study. *Journal of medical Internet research.* 2018;20(1):e11. Epub 2018/01/18. doi: 10.2196/jmir.8444. PubMed PMID: 29335237; PubMed Central PMCID: PMC5789160.
33. Lawton M, Sage K, Haddock G, Conroy P, Serrant L. Speech and language therapists' perspectives of therapeutic alliance construction and maintenance in aphasia rehabilitation post-stroke. *International Journal of Language & Communication Disorders.* 2018;53(3):550-63. doi: 10.1111/1460-6984.12368.
34. Wilson S, Chaloner N, Osborn M, Gauntlett-Gilbert J. Psychologically informed physiotherapy for chronic pain: patient experiences of treatment and therapeutic process. *Physiotherapy.* 2017;103(1):98-105. doi: 10.1016/j.physio.2015.11.005.
35. Gard G. Factors important for good interaction in physiotherapy treatment of persons who have undergone torture: A qualitative study. *Physiotherapy Theory and Practice.* 2007;23(1):47-55. doi: 10.1080/09593980701209584.
