# Supplementary material for: Identifying central elements of the therapeutic alliance in the setting of telerehabilitation: A qualitative study
Source: PubMed Central journal article supplement (PMC10923432; doi:10.1371/journal.pone.0299909), 2024-03-08
Supplement: pone.0299909.s005.pdf [file pone.0299909.s005.pdf]

**S4 Table. Codes derived from expert interview data including descriptors.**

| Codes                | Subcodes                | Descriptors                                                                                                                        |
|----------------------|-------------------------|------------------------------------------------------------------------------------------------------------------------------------|
| <b>Communication</b> | Effective communication | Effective communication necessary to build the bond                                                                                |
|                      |                         | Communication on an equal basis                                                                                                    |
|                      |                         | Using the most effective communication channels (verbal, non-verbal, paraverbal) as a therapist                                    |
|                      |                         | Ensuring good video quality / lighting to discern a change in facial expression and gestures in telerehabilitation                 |
|                      |                         | Exchanging information in a timely manner                                                                                          |
|                      | Clear instructions      | Providing the patient with unambiguous instructions, particularly in telerehabilitation where tactile facilitation is not possible |
|                      | Mutual feedback         | Mutual feedback using the most appropriate communication channels                                                                  |
|                      | Touch                   | Using touch as a means to treat and communicate in rehabilitation                                                                  |
|                      |                         | Advising caregivers and the family on how to use professional touch in telerehabilitation                                          |
|                      |                         | Caregivers and relatives acting as co-therapists using professional touch                                                          |

|                       |                                                                              |                                                                                                                    |
|-----------------------|------------------------------------------------------------------------------|--------------------------------------------------------------------------------------------------------------------|
|                       | Advising on safety                                                           | Advising caregivers and family on how to safeguard the patient in telerehabilitation                               |
|                       | Appropriate means of communication                                           | Choosing the most appropriate means of communication in rehabilitation (personal, written, video)                  |
|                       |                                                                              | Choosing the most appropriate means of communication in telerehabilitation (time-delayed, real-time, email, video) |
| <b>Bond</b>           | Safeguarding                                                                 | Safeguarding the patient as a prerequisite for building trust                                                      |
|                       | Presence                                                                     | Being present as a therapist                                                                                       |
|                       |                                                                              | Being present as a patient                                                                                         |
|                       | Responsiveness                                                               | Being responsive as a therapist                                                                                    |
|                       | Openness                                                                     | Being open for the physiotherapist's suggestions as a patient                                                      |
|                       | Self-disclosure                                                              | Self-disclosure and openness of the therapist and patient to strengthen their bond                                 |
|                       | Genuinely caring                                                             | Being genuinely caring as a therapist                                                                              |
|                       | Respect                                                                      | Respecting each other                                                                                              |
|                       | Acceptance                                                                   | Accepting each other                                                                                               |
|                       | Honesty                                                                      | Being honest                                                                                                       |
| Friendly interactions | The therapist being friendly and warm in their interactions with the patient |                                                                                                                    |

|  |                                      |                                                                                                      |
|--|--------------------------------------|------------------------------------------------------------------------------------------------------|
|  |                                      | The patient being friendly and sociable in their interactions with the therapist                     |
|  | Self-reflexion                       | Being self-reflective as a therapist                                                                 |
|  | Congruence and authenticity          | Congruence and authenticity of the therapist                                                         |
|  | Humour                               | Humour to intensify the therapeutic relationship                                                     |
|  | Appreciation                         | Appreciating the patient as a person                                                                 |
|  | Building an emotional relationship   | Emotional relationship between the patient and therapist                                             |
|  |                                      | Acknowledging and validating the patient's fears, expectations and hopes                             |
|  |                                      | Acknowledging the patient's emotional responses                                                      |
|  |                                      | Acknowledging the influence of technology on the patient's emotional responses in telerehabilitation |
|  |                                      | Recognising the potential influence of technology on the therapeutic relationship                    |
|  | Building a professional relationship | Defining the therapist's and patient's roles                                                         |
|  |                                      | Appreciating the therapist's professional competence and guidance                                    |
|  |                                      | Recognising the patient's emotional, cognitive and physical needs                                    |

|              |                 |                                                                                                                        |
|--------------|-----------------|------------------------------------------------------------------------------------------------------------------------|
|              |                 | Understanding the patient's needs and fears                                                                            |
|              |                 | Responding to the patient's needs                                                                                      |
|              |                 | Delivering comprehensive information for the patient                                                                   |
|              |                 | Strengthening the patient's awareness of his / her clinical problem                                                    |
|              |                 | The patient being receptive for the therapist's advice                                                                 |
|              |                 | Active listening of the therapist and patient                                                                          |
|              |                 | Shared decision-making                                                                                                 |
|              |                 | Patient education                                                                                                      |
| <b>Trust</b> | Safety          | Reducing risks and enhancing safety, respectively, particularly in telerehabilitation to increase trust of the patient |
|              | Respect         | Building mutual trust through transparent and respectful communication                                                 |
|              | Transparency    |                                                                                                                        |
|              | Empathy         | Being empathetic as a therapist as a prerequisite for building trust                                                   |
|              | Mutual exchange | Enhancing trust through mutual exchange                                                                                |
|              | Continuous care | Strengthening trust of the patient through continuous (tele-)rehabilitation care                                       |

|                                             |                       |                                                                                       |
|---------------------------------------------|-----------------------|---------------------------------------------------------------------------------------|
| <b>Agreeing on goals and tasks</b>          | Similarity of goals   | Delivering comprehensive information for the patient                                  |
|                                             | Shared responsibility | Strengthening the patient's awareness of his / her clinical problem                   |
|                                             |                       | Shared responsibility for a successful task completion                                |
|                                             | Goal setting          | The patient being receptive for the therapist's advice                                |
|                                             | Defining tasks        | Active listening of the therapist and patient                                         |
|                                             | Targeting             | Shared decision-making                                                                |
|                                             | Individualising       | Patient education                                                                     |
|                                             | Encouraging           | Encouraging the patient                                                               |
|                                             | Adherence             | Patient's adherence with performing tasks                                             |
|                                             | Congruence            | Congruence between the patient and therapist on goal setting in (tele-)rehabilitation |
| <b>Patient autonomy and self-management</b> | Being prepared        | The patient's need to prepare him-/herself for using telerehabilitation               |
|                                             |                       | Start of telerehabilitation session only once the therapist and patient are ready     |
|                                             | Self-efficacy         | Facilitation of self-efficacy of the patient in telerehabilitation                    |
|                                             | Self-management       | Greater need for the patient's self-management in telerehabilitation                  |

|                                  |                                                                   |                                                                          |
|----------------------------------|-------------------------------------------------------------------|--------------------------------------------------------------------------|
|                                  | Autonomy                                                          | Higher autonomy of the patient in telerehabilitation necessary           |
| <b>Motivation of the patient</b> | Motivating factors in rehabilitation and telerehabilitation       | Being heard by the therapist                                             |
|                                  |                                                                   | Receiving therapist's response to one's individual questions             |
|                                  |                                                                   | The therapist approving the patient's efforts                            |
|                                  |                                                                   | Being encouraged by the therapist                                        |
|                                  |                                                                   | Receiving direct (real-time) feedback from the therapist                 |
|                                  |                                                                   | Receiving direct (real-time) feedback from the patient                   |
|                                  |                                                                   | Working on jointly defined therapy goals                                 |
|                                  |                                                                   | Experiencing improvement of motor function through (tele-)rehabilitation |
|                                  |                                                                   | Virtual reminders                                                        |
|                                  |                                                                   | Virtual reward systems                                                   |
|                                  | Virtual display of success in therapy                             |                                                                          |
| Further motivating factors       | Being able to access telerehabilitation services despite COVID-19 |                                                                          |
| <b>Agreeing on roles</b>         | Roles of the therapist                                            | The therapist acting as a technical supporter                            |
|                                  |                                                                   | The therapist acting as a rehabilitation expert                          |

|                                    |  |                                                                                                         |
|------------------------------------|--|---------------------------------------------------------------------------------------------------------|
|                                    |  | The therapist acting as an expert despite a virtual surrounding                                         |
| Roles of the patient               |  | With respect to the role(s) of the patient, individual needs to be accounted for by the therapist       |
|                                    |  | The patient at the centre of the therapy                                                                |
|                                    |  | A clear distribution of roles between the therapist and patient to enhance the therapeutic relationship |
|                                    |  |                                                                                                         |
| Roles of the family and caregivers |  | Ensuring the patient's physical safety in telerehabilitation                                            |
|                                    |  | As co-therapist in telerehabilitation                                                                   |
|                                    |  | Supporting goal setting in (tele)rehabilitation                                                         |
|                                    |  | Addressing the patient's needs in rehabilitation (travel to the clinic, physical support etc.)          |
|                                    |  | Coordinating / supporting telerehabilitation preparations (material, technological)                     |
|                                    |  | Being the extended arm of the therapist in telerehabilitation                                           |
|                                    |  | Helping in task performance of the patient in telerehabilitation                                        |

|                                                                            |                                                              |                                                                                                     |
|----------------------------------------------------------------------------|--------------------------------------------------------------|-----------------------------------------------------------------------------------------------------|
|                                                                            |                                                              | Selecting tasks / supporting unsupervised homebased practice of the patient in (tele)rehabilitation |
|                                                                            |                                                              | Supporting the patient with their use of technology in telerehabilitation                           |
| <b>External factors</b>                                                    | Home environment                                             | Patient's home environment (in contrast to a rehabilitation clinic environment)                     |
|                                                                            |                                                              | Risks (of falls) due to the absence of the therapist                                                |
|                                                                            |                                                              | Preparation and follow-up times need to be considered for a telerehabilitation setting              |
|                                                                            | Time                                                         | Time for the therapy in (tele)rehabilitation                                                        |
|                                                                            |                                                              | Time required for technical problem solving of the therapist/caregivers in telerehabilitation       |
|                                                                            |                                                              | The amount of time corresponding to the efforts of the therapist and caregivers or the patient      |
|                                                                            | Supporters                                                   | The family and caregivers                                                                           |
|                                                                            | Technology-related aspects to consider in telerehabilitation | Virtual connection impacting on the patient's emotional state                                       |
|                                                                            |                                                              | Virtual connection impacting on the patient's trust in the therapist                                |
| Virtual connection impacting on the bond between the therapist and patient |                                                              |                                                                                                     |



|                                                   |                                                      |                                                                                           |
|---------------------------------------------------|------------------------------------------------------|-------------------------------------------------------------------------------------------|
|                                                   |                                                      | Taking precautions to ensure safety in telerehabilitation                                 |
|                                                   |                                                      | Data protection                                                                           |
|                                                   |                                                      | Material costs / requirements                                                             |
|                                                   |                                                      | (Dys-)function of telerehabilitation programmes                                           |
|                                                   |                                                      | Challenges related to using technology in some patient groups                             |
|                                                   | Potentially disruptive factors in telerehabilitation | Failure of the WiFi connection                                                            |
|                                                   |                                                      | Inability to meet technical requirements                                                  |
|                                                   |                                                      | Technological failure                                                                     |
|                                                   |                                                      | Using unfamiliar telerehabilitation software and/or hardware as a therapist               |
|                                                   |                                                      | Introducing telerehabilitation software and/or hardware unfamiliar to the patient         |
|                                                   |                                                      | Failure of real-time data transmission                                                    |
|                                                   |                                                      | Therapist's or patient's hesitancy towards using technology or telerehabilitation         |
|                                                   |                                                      | Data backup failure in telerehabilitation                                                 |
| <b>Differences between telerehabilitation and</b> | Preparation time                                     | A longer preparation time in telerehabilitation except when using ready-to-use programmes |
|                                                   | Active role of the patient                           | The patient being placed in a more active role in telerehabilitation.                     |

|                                 |                       |                                                                                                                                 |
|---------------------------------|-----------------------|---------------------------------------------------------------------------------------------------------------------------------|
| <b>conventional<br/>therapy</b> | Change in interaction | In telerehabilitation, potential shift of the interaction with the patient towards using telerehabilitation programmes / games. |
|                                 | Hands-on              | In telerehabilitation, hands-on techniques or professional touch not possible.                                                  |
|                                 | Field of action       | In telerehabilitation, potentially smaller field of action compared to conventional rehabilitation.                             |
